# Supplementary material for: Genome skimming with nanopore sequencing precisely determines global and transposon DNA methylation in vertebrates
Source: HighWire-hosted journal article supplement (doi:10.1101/gr.277743.123), 2023-06-01
Supplement: Supplemental_File_S1.xlsx [file Supplemental_File_S1.xlsx]

## Sheet: Primate Depth
Name			Depth	Bases	Factor for 300 Mb	Methylation 0.1X	Genome	Bases mapped	Percent mapped	Quality
cynosAF-P15130	Crab-eating macaque	Macaca fascicularis	14.01	40711542639	0.00713776	80.0649	Macaca_fascicularis_6.0	304285839	100	34.5
rhesusEF-P17523	Rhesus macaque	Macaca mulatta	15.75	46745714840	0.00634921	77.0809	Mmul_10	302135488	99.91	34.6
baboonAM-P16793	Baboon	Papio anubis	9.54	27335854952	0.0104822	82.3713	Panubis1.1	301543595	99.51	34.8
chimpEF-P14327	Chimpanzee	Pan troglodytes	11.22	34215813623	0.00891266	82.841	panTro6	321586167	99.82	34.9
marmosetEM-P21533	Marmoset	Callithrix jacchus	15.79	45731604832	0.00633312	77.5448	Callithrix_jacchus_cj1700_1.1	2.89624e+08	100	33
Chimp bootstrap stats for genome skimming
10X (30 Gb)	1X (3 Gb)	0.1X (300 Mb)	0.01X (30 Mb)	0.03X (10 Mb)	0.001X (3 Mb)	0.0001X (300 Kb)
82.8517	82.8594	82.8126	82.4286	82.3149	82.4666	62.8183	0.823149	82.3149
82.8553	82.8668	82.9742	82.821	82.5685	80.7973	90.3347	0.825685	82.5685
82.8643	82.9164	82.4703	82.3859	83.1018	84.5956	80.9951	0.831018	83.1018
82.8528	82.8718	83.0809	82.7244	82.1293	81.7168	91.3149	0.821293	82.1293
82.8464	82.7917	82.5737	81.797	83.2567	85.056	79.2453	0.832567	83.2567
82.8656	82.9112	82.7259	83.0703	82.5054	83.6474	78.3862	0.825054	82.5054
82.8597	82.7446	82.5837	83.3271	82.1654	83.6183	91.9674	0.821654	82.1654
82.853	82.8929	83.2693	83.1357	83.153	80.6918	72.8053	0.83153	83.153
82.8607	82.7872	83.0824	83.2877	82.5604	78.9035	89.8511	0.825604	82.5604
82.8577	82.9075	82.8372	82.7674	81.8813	84.2943	81.406	0.818813	81.8813
Table 1. DNA Methylation at Varying Coverage Levels, Bootstrapped Subsampling
Coverage Level	11.2X (34 Gb)	10X (30 Gb)	1X (3 Gb)	0.1X (300 Mb)	0.01X (30 Mb)	0.03X (10 Mb)	0.001X (3 Mb)	0.0001X (300 Kb)
Mean	82.8655	82.8567	82.855	82.841	82.7745	82.5637	82.5788	81.9124
Bootstrap replicates	1	10	10	10	10	10	10	10
Minimum		82.8464	82.7446	82.4703	81.797	81.8813	78.9035	62.8183
Maximum		82.8656	82.9164	83.2693	83.3271	83.2567	85.056	91.9674
Range		0.0192	0.1718	0.799	1.5301	1.3754	6.1525	29.1491
Std. Deviation		0.00600848	0.0599572	0.259519	0.473473	0.470865	2.01018	9.37868
Std. Error of Mean		0.00190005	0.0189601	0.082067	0.149725	0.148901	0.635674	2.9658

## Sheet: mouse bio replicates
Biological replicates of mouse were barcoded representing 3 tissues, hippocampus, cortex, and testes.
Barcode	Tissue	Methylation	Bases mapped	Percent mapped	Quality	Genome	Median bp	Median % map	Median Q
1	Hippocampus	75.7928	17270663	98.81	29.8	mm39
2	Hippocampus	79.8973	57748903	99.31	30.2	mm39
3	Hippocampus	79.4597	29655865	97.36	30	mm39
4	Hippocampus	78.64	28367999	99.18	30.5	mm39
5	Hippocampus	79.3081	22775073	98.45	30	mm39	28367999	98.81	30
6	Cortex	79.4597	52373591	99.16	29.1	mm39
7	Cortex	78.3117	38761587	96.36	29.4	mm39
8	Cortex	78.4377	13561022	99.13	28.8	mm39
9	Cortex	78.1411	12795416	97.74	29	mm39
10	Cortex	76.9686	8519501	98.97	29.1	mm39	13561022	98.97	29.1
11	Testes	81.1411	87363759	98.33	30.5	mm39
12	Testes	80.022	8695426	98.83	30.3	mm39
13	Testes	79.7609	34670192	99.14	29.7	mm39
14	Testes	79.7886	66204666	99.21	30.2	mm39
15	Testes	79.6498	48550614	98.5	30.1	mm39	48550614	98.83	30.2
16	low control	1.40958	72792604	99.15	26.2	mm39
17	low control	1.43118	133833849	99.17	25.8	mm39
18	low control	1.08157	99216934	99.24	26	mm39
19	low control	1.21422	128761561	99.18	26	mm39
20	low control	1.18572	70957211	99.27	26	mm39	99216934	99.18	26
21	high control	99.4479	47318559	98.82	30.1	mm39
22	high control	99.3303	62547110	98.84	30.2	mm39
23	high control	99.354	28622710	99.11	29.9	mm39
24	high control	99.5718	54837343	99.08	30.1	mm39	51077951	98.96	30.1
Median			4.79346e+07	99.095	29.85
Table 2. Biological and Technical Replication of DNA Methylation in Mouse at Low Coverage.
Tissue	Methylation (%)	SD (%)	Replicates	Median (Mb)	Mean % mapped	Mean Quality
Hippocampus	78.6196	1.64344	5	28.3	98.81	30
Cortex	78.2638	0.88816	5	13.5	98.97	29.1
Testes	80.0725	0.612541	5	48.5	98.83	30.2
Low Control	1.26445	0.150854	5	99.2	99.18	26
High Control	99.426	0.109666	4	51	98.96	30.1

## Sheet: zoo muscle final
Animal	Spec ng/ul	Volume	Batch	ID Number	Barcode	Binomial	Genome	Genome Size	Methylation	Bases mapped	Mapping efficiency	Avg Q-score	Taxon ID
Frog	231	100	zoo-skim-25-48	45	21	Rana catesbeiana	RCv2.1	6250353185	92.6692	36237371	97.86	28.8	8400
Axolotl	391	100	zoo-skim-25-48	46	22	Ambystoma mexicanum	AmbMex60DD	28206905576	89.0135	40005341	98.13	28.8	8296
Zebrafish	39	30	zoo-skim-1-24	5	5	Danio rerio	GRCz11	1679186873	86.1646	57939454	98.58	30.8	7955
Rattlesnake	22	100	zoo-skim-25-48	42	18	Crotalus atrox	Cadam_11369	1597647985	85.0807	17442067	96.15	26.1	8730
Elephant	456	100	zoo-skim-1-24	3	3	Loxodonta africana	Loxafr3.0	3196738035	83.8292	30678719	97.27	26	9785
Mako Shark	234	100	zoo-skim-25-48	48	24	Isurus oxyrinchus	ASM2677070v1	4975480707	81.4489	50252469	98.46	28.8	57983
Yak	135	100	zoo-skim-1-24	8	8	Bos grunniens	BosGru3.1	2831460571	78.0594	79425178	97.56	30.2	30521
Bear	150	10	zoo-skim-1-24	7	7	Ursus americanus	gsc_jax_bbear_1.0	2351948976	77.6708	176479059	97.59	28.8	9643
Python	356	50	zoo-skim-25-48	43	19	Python bivittatus	Python_molurus_bivittatus-5.0.2	1435034535	77.3292	22185501	96.07	26.7	176946
Rat	8	20	zoo-skim-25-48	29	5	Rattus norvegicus	mRatBN7.2	2647915728	76.5853	9280477	93.43	26.2	10116
Muskrat	198	10	zoo-skim-25-48	30	6	Ondatra zibethicus	OndZib_v1_BIUU	2562752769	76.569	37800323	97	28.3	10060
Otter	44	10	zoo-skim-1-24	20	20	Lontra canadensis	GSC_riverotter_1.0	2405748306	76.5193	30634505	98.03	28.4	76717
Horse	36	10	zoo-skim-1-24	24	24	Equus caballus	EquCab3.0	2506949475	76.4253	39012242	97.1	28.6	9796
Human	182	25	zoo-skim-25-48	25	1	Homo sapiens	GRCh38.p14	3298912062	76.0245	131182089	98.71	30.7	9606
Woodchuck	166	25	zoo-skim-25-48	31	7	Marmota monax	Marmota_monax_Labrador192_F-V1.1	2638791045	76.0001	81661564	96.6	29.2	9995
Elk	158	10	zoo-skim-1-24	14	14	Cervus canadensis	ASM1932006v1	2526629436	75.3883	64687903	98.37	28.5	9864
Cat	331	30	zoo-skim-1-24	23	23	Felis catus	F.catus_Fca126_mat1.0	2425730029	75.2689	132831569	98.84	29.7	9685
Rabbit	135	100	zoo-skim-25-48	27	3	Oryctolagus cuniculus	UM_NZW_1.0	2841489785	74.9106	147038970	97.73	29.8	9986
Raccoon	51	10	zoo-skim-1-24	21	21	Procyon lotor	Plotor_platanus500	2251279544	74.247	51515747	94.03	28.7	9654
Goat	68	10	zoo-skim-1-24	13	13	Capra hircus	ARS1.2	2922600443	74.1782	81137961	97.64	28.5	9925
Camel	221	100	zoo-skim-1-24	18	18	Camelus dromedarius	CamDro3	2169346739	74.1604	114677897	98.54	30.3	9838
Armadillo	121	10	zoo-skim-25-48	26	2	Dasypus novemcinctus	Dasnov3.2	1198908245	73.8276	146709587	98.71	29.7	9359
Alpaca	258	10	zoo-skim-1-24	17	17	Vicugna pacos	VicPac3.2	2118853581	73.7259	130147779	98.59	29.7	30538
Hyena	140	100	zoo-skim-1-24	4	4	Crocuta crocuta	BGI_CrCroc_1.0	2348377234	73.4727	3631565	95.06	26.8	9678
Golden Gopher	500	100	zoo-skim-25-48	28	4	Ictidomys tridecemlineatus	HiC_Itri_2	2478949113	73.3867	94109386	97	29.1	43179
Sheep	61	1	zoo-skim-1-24	12	12	Ovis aries	ARS-UI_Ramb_v2.0	2628146906	72.6493	65880016	97.51	29.9	9940
Deer	50	2	zoo-skim-1-24	15	15	Odocoileus virginianus	Ovir.te_1.0	2380489210	71.2085	81504106	96.92	29.2	9874
Falcon	264	100	zoo-skim-25-48	40	16	Falco columbarius	ASM2756420v1	1188729421	71.0394	54900739	98.54	29	8953
Squirrel	182	50	zoo-skim-25-48	32	8	Sciurus carolinensis	mSciCar1.2	2815413801	69.4555	82882982	98.73	29.4	30640
Dog	60	1	zoo-skim-1-24	19	19	Canis familiaris	ROS_Cfam_1.0	2396875024	69.1077	147295720	98.55	30.2	9615
Goose	31	9	zoo-skim-25-48	38	14	Branta canadensis	GSC_cangoose_1.0	1153386549	67.3852	174358699	95.46	29.4	8847
Turkey	260	100	zoo-skim-25-48	37	13	Meleagris gallopavo	Turkey_5.1	1115474681	67.1921	188839058	98.24	30.7	9103
Duck	338	100	zoo-skim-25-48	39	15	Anas platyrhynchos	ZJU1.0	1188516685	63.4487	83473733	96.96	29.6	8839
Pheasant	94	75	zoo-skim-25-48	35	11	Phasianus colchicus	ASM414374v1	1017507340	60.9653	201413179	97.62	30.3	9054
Summary stats						All				8.02816e+07	97.63	29.15
Table 3. Summary Statistics for Vertebrates by Class
Class	Mean Genome Size	Mean Methylation (%)	Median (Mb)	Mean % Mapped	Mean Quality
Amphibian	6.2 or 28.2 Gb	90.8414	38.1	97.995	28.8
Fish	3.2 Gb	83.8068	54.1	98.52	29.8
Reptile	1.4 Gb	81.2049	19.8	96.11	26.4
Mammal	2.5 Gb	74.6468	85.2	97.37	28.9522
Bird	1.1 Gb	66.0061	132.2	97.84	29.9

## Sheet: Chimp Alu-L1 bootstrap
Bootstrap	Alu										LINE1
10X (30 Gb)	94.6842	94.6848	94.6878	94.6847	94.6847	94.6864	94.6869	94.6847	94.6858	94.6861	90.1605	90.1581	90.1531	90.1552	90.1646	90.1592	90.1611	90.1636	90.1594	90.1725
1X (3 Gb)	94.7327	94.6879	94.7024	94.7552	94.5998	94.6764	94.7319	94.6948	94.6924	94.6828	90.1712	90.1141	90.1949	90.0934	90.159	90.1722	90.1281	90.2015	90.1362	90.1594
0.1X (300 Mb)	94.7327	94.6879	94.7024	94.7552	94.5998	94.6764	94.7319	94.6948	94.6924	94.6828	90.1234	90.2102	90.0958	90.1416	90.1281	89.9978	90.1371	90.2162	90.3748	90.2349
0.01X (30 Mb)	94.7716	94.7457	94.7573	94.5635	94.6964	94.7234	94.9414	95.0067	94.6231	94.8384	89.916	90.6333	90.2702	90.5133	89.9712	89.8503	90.0389	90.4899	89.9726	90.2232
0.001X (3 Mb)	95.7011	93.956	94.7286	94.9323	94.9824	94.1903	93.75	94.3097	93.8477	93.523	91.8291	91.0879	89.1058	90.1049	91.6527	89.2857	89.6437	90.3286	88.2018	89.8981
0.0001X (300 Kb)	95.2381	94.5455	91.0448	95.2159	94.3066	93.4109	94.9477	95.9155	93.9785	93.985	90.9091	87.5	90.1554	92.3636	93.6306	92.2449	85.2632	92.7419	92.6554	85.9259
Table 4. Chimpanzee Alu and LINE1 Methylation with 10 Bootstrap Replicates
	Alu			LINE1
Coverage	Mean (%)	SD (%)		Mean (%)	SD (%)
10X (30 Gb)	94.6856	0.00117799		90.1607	0.00539301
1X (3 Gb)	94.6956	0.0422595		90.153	0.0347248
0.1X (300 Mb)	94.6956	0.0422595		90.166	0.100399
0.01X (30 Mb)	94.7668	0.134389		90.1879	0.280259
0.001X (3 Mb)	94.3921	0.680578		90.1138	1.15136
0.0001X (300 Kb)	94.2588	1.34912		90.339	3.04346

## Sheet: Chimp all repeats
Chimp all repeat family methylation percentages
chimpEF-P14327-barcode04				Element	bases in genome	Perc in genome
5S-Deu-L2	77.6877			5S-Deu-L2	268105	0.00893683
acro	90.4627			acro	977027	0.0325676
Alu	94.4309			Alu	304581070	10.1527
centr	85.5115			centr	1336141	0.044538
CR1	85.8064			CR1	12010957	0.400365
Crypton	83.6982			Crypton	41660	0.00138867
Crypton-A?	83.9898			Crypton-A?	21212	0.000707067
DNA	84.2195			DNA	869320	0.0289773
DNA?	84.482			DNA?	337158	0.0112386
Dong-R4	86.33			Dong-R4	113929	0.00379763
ER	94.8718			ER	370	1.23333e-05
ERV1	89.178			ERV1	85802232	2.86007
ERV1?	84.003			ERV1?	269446	0.00898153
ERVK	88.7857			ERVK	9110050	0.303668
ERVL	87.0266			ERVL	56131225	1.87104
ERVL-MaLR	86.78			ERVL-MaLR	110209753	3.67366
ERVL?	85.4014			ERVL?	892992	0.0297664
Gypsy	85.1515			Gypsy	3689257	0.122975
Gypsy?	85.9557			Gypsy?	1343176	0.0447725
hAT	82.2122			hAT	306964	0.0102321
hAT-Ac	85.2056			hAT-Ac	787727	0.0262576
hAT-Ac?	66.5591			hAT-Ac?	30329	0.00101097
hAT-Blackjack	87.1148			hAT-Blackjack	2582481	0.0860827
hAT-Charlie	88.2227			hAT-Charlie	46771779	1.55906
hAT-hAT19	95			hAT-hAT19	86	2.86667e-06
hAT-Tag1	84.203			hAT-Tag1	524861	0.0174954
hAT-Tip100	86.3549			hAT-Tip100	11907472	0.396916
hAT-Tip100?	85.8593			hAT-Tip100?	251951	0.00839837
hAT?	84.3751			hAT?	233454	0.0077818
Helitron	86.9479			Helitron	369153	0.0123051
Helitron?	86.7207			Helitron?	65516	0.00218387
I-Jockey	81.5482			I-Jockey	20847	0.0006949
Kolobok	85.5778			Kolobok	41575	0.00138583
L1	89.548			L1	511330604	17.0444
L1-Tx1	64.5961			L1-Tx1	45463	0.00151543
L2	86.4042			L2	110461445	3.68205
Low_complexity	36.844			Low_complexity	6232511	0.20775
LTR	85.9388			LTR	1560837	0.0520279
LTR?	87.579			LTR?	1587289	0.0529096
Merlin	87.9062			Merlin	38950	0.00129833
MIR	84.7121			MIR	84181179	2.80604
MULE-MuDR	88.8451			MULE-MuDR	688224	0.0229408
MULE-MuDR?	87.4824			MULE-MuDR?	93605	0.00312017
Penelope	82.0367			Penelope	97457	0.00324857
PIF-Harbinger	87.1671			PIF-Harbinger	32970	0.001099
PiggyBac	90.0791			PiggyBac	501178	0.0167059
PiggyBac?	83.2475			PiggyBac?	41325	0.0013775
RNA	90.2879			RNA	111616	0.00372053
rRNA	82.9102			rRNA	227534	0.00758447
RTE-BovB	84.1921			RTE-BovB	1306733	0.0435578
RTE-X	87.051			RTE-X	3480432	0.116014
Satellite	88.0536			Satellite	17163721	0.572124
scRNA	91.3699			scRNA	180197	0.00600657
Simple_repeat	60.2965			Simple_repeat	46249585	1.54165
snRNA	84.0427			snRNA	332712	0.0110904
srpRNA	89.691			srpRNA	254598	0.0084866
SVA	98.2566			SVA	4662975	0.155433
TcMar	83.9669			TcMar	12424	0.000414133
TcMar-Mariner	89.9088			TcMar-Mariner	2809083	0.0936361
TcMar-Pogo	78.3105			TcMar-Pogo	3975	0.0001325
TcMar-Tc1	86.1333			TcMar-Tc1	134015	0.00446717
TcMar-Tc2	88.8714			TcMar-Tc2	1631575	0.0543858
TcMar-Tigger	89.4989			TcMar-Tigger	37590290	1.25301
TcMar?	84.1189			TcMar?	30914	0.00103047
telo	89.9537			telo	100539382	3.35131
tRNA	53.0889			tRNA	370508	0.0123503
tRNA-Deu	83.4436			tRNA-Deu	61539	0.0020513
tRNA-RTE	86.1016			tRNA-RTE	697825	0.0232608
Unknown	83.0165			Unknown	725419	0.0241806
Unspecified	96.4286			Unspecified	80	2.66667e-06
Y-chromosome	85.8128			Y-chromosome	28356443	0.945215

## Sheet: mouse repeats >1%
Sample	1-hip	2-hip	3-hip	4-hip	5-hip	6-cortex	7-cortex	8-cortex	9-cortex	10-cortex	11-testes	12-testes	13-testes	14-testes	15-testes	16-low	17-low	18-low	19-low	20-high	21-high	22-high	23-high	24-high
Alu	89.6086	89.963	91.0574	90.7166	91.6552	91.0574	90.7229	91.0163	91.0701	89.1495	90.2451	88.5038	89.6337	89.7416	89.2054	1.58421	1.49026	1.05714	1.06742	99.531	99.531	99.3926	99.3437	99.4359
B2	88.4826	87.8786	88.415	88.9973	88.048	88.415	88.8468	89.5925	90.7651	85.948	91.0177	89.8214	90.8927	91.5214	90.3993	1.6137	1.55177	1.19952	1.38597	99.3562	99.3562	99.4653	99.3605	99.3635
B4	87.7294	86.7373	88.3883	88.492	87.9969	88.3883	89.0584	89.0899	88.7927	87.4023	90.7617	90.6739	90.0635	91.0744	91.1943	1.62665	1.68162	1.46747	1.28522	99.6067	99.6067	99.2831	99.4299	99.541
ERV1	88.601	86.5439	89.9866	88	88.2189	89.9866	87.7522	85.9882	91.07	78.7018	86.9105	86.6799	84.7065	87.785	83.1167	2.04414	1.10942	1.46682	0.904872	99.5868	99.5868	99.3008	99.5468	99.7249
ERVK	89.8019	90.9807	90.8222	88.7948	89.7601	90.8222	90.2516	92.0562	86.3881	89.2357	84.0493	87.3672	84.6378	84.8225	83.4106	2.38143	2.09626	1.19562	0.933563	99.6631	99.6631	99.2443	99.5453	99.543
ERVL	87.037	86.8998	87.4189	87.8917	88.865	87.4189	87.0297	89.9394	86.3881	81.2721	89.0474	87.4336	89.6218	88.4895	89.9876	3.13145	1.00533	1.98861	1.02063	99.3275	99.3275	99.3697	99.4267	99.4078
ERVL-MaLR	84.5122	86.4439	87.111	86.3985	86.6448	87.111	86.5984	87.7001	87.7035	88.6705	89.3159	88.8517	88.9454	89.8131	89.1518	1.4613	1.43047	1.12094	1.27429	99.3105	99.3105	99.3082	99.5624	99.5469
L1	87.2964	88.9599	88.8794	89.3906	88.9997	88.8794	89.575	89.0231	87.7176	87.6664	87.8453	87.9221	86.576	88.0127	86.8678	1.10088	1.22607	1.09637	1.00001	99.1919	99.1919	98.8278	98.3366	99.4057
L1-dep	92.9856	87.2973	88.4882	90.8587	86.9707	88.4882	89.4891	91.7526	84.1981	91.2281	83.0033	78.8321	75.5795	83.0786	84.2837	2.31317	0.878004	0.672043	0.874126	99.8549	99.8549	99.6767	98.7923	99.6047
LTR	91.1477	91.7028	90.039	94.1541	89.7361	90.039	86.4156	86.3636	85.5422	84.0278	86.1056	89.4081	86.8357	87.6602	85.7885	8.41796	0.445886	0.340467	0.26749	99.1297	99.1297	99.7043	99.8429	99.8066
												Table 5. Mouse Repeat DNA Methylation by Family and Tissue
	Hippocampus	SD	Cortex	SD	Testes	SD	Low Control	SD	High Control	SD		Repeat Family	Hippocampus (%)	SD (%)	Cortex (%)	SD (%)	Testes (%)	SD (%)	Low Control (%)	SD (%)	High Control (%)	SD (%)
Alu	90.6002	0.825346	90.6032	0.825015	89.4659	0.652817	1.29976	0.276915	99.4468	0.0834618		Alu-B1	90.6002	0.825346	90.5422	0.792509	87.9883	2.90935	1.29976	0.276915	99.4468	0.0834618
B2	88.3643	0.433937	88.7135	1.78441	90.7305	0.64621	1.43774	0.185646	99.3803	0.0475878		B2	88.3643	0.433937	88.319	1.39243	90.576	0.652709	1.43774	0.185646	99.3803	0.0475878
B4	87.8688	0.70257	88.5463	0.698615	90.7536	0.441551	1.51524	0.17822	99.4935	0.138018		B4	87.8688	0.70257	84.8229	8.21675	90.8048	0.457288	1.51524	0.17822	99.4935	0.138018
ERV1	88.2701	1.23607	86.6998	4.88578	85.8397	1.89313	1.38131	0.49919	99.5492	0.154435		ERV_classII	90.0319	0.891901	89.7508	2.13813	85.4297	1.65979	1.65172	0.696147	99.5317	0.171326
ERVK	90.0319	0.891901	89.7508	2.13813	84.8575	1.50789	1.65172	0.696147	99.5317	0.171326		ERVL-MaLR	86.2221	0.99659	76.6827	24.2453	89.1619	0.380917	1.32175	0.156916	99.4077	0.134249
ERVL	87.6225	0.794159	86.4096	3.17243	88.916	1.00537	1.78651	1.00772	99.3718	0.0453899		L1	88.7052	0.811829	87.8684	2.16678	88.7646	3.23743	1.10583	0.0926805	98.9908	0.420582
ERVL-MaLR	86.2221	0.99659	87.5567	0.774559	89.2156	0.379666	1.32175	0.156916	99.4077	0.134249
L1	88.7052	0.811829	88.5723	0.844701	87.4448	0.670553	1.10583	0.0926805	98.9908	0.420582
L1-dep	89.3201	2.55474	89.0312	3.00397	80.9554	3.64653	1.18433	0.758677	99.5567	0.441267
LTR	91.3559	1.75726	86.4776	2.21228	87.1596	1.44933	2.36795	4.034	99.5227	0.362274

## Sheet: Mouse all repeats HIP
Mouse all repeat family methylation from hippocampus samples								Mouse genome mm39 RepeatMasker
Element	Mouse 1	Mouse 2	Mouse 3	Mouse 4	Mouse 5	Avg		Element	bases in genome	Perc in genome
Satellite	91.4927	91.1553	90.1948	92.2262	93.8104	91.7759		Satellite	4560134	0.152004
LTR	91.1477	91.7028	90.039	94.1541	89.7361	91.3559		LTR	11957850	0.398595
Alu	89.6086	89.963	91.0574	90.7166	91.6552	90.6002		Alu	66186230	2.20621
Y-chromosome	86.6667	88.8889	89.1892	100	85.7143	90.0918		Y-chromosome	576441	0.0192147
ERVK	89.8019	90.9807	90.8222	88.7948	89.7601	90.0319		ERVK	138112282	4.60374
L1-dep	92.9856	87.2973	88.4882	90.8587	86.9707	89.3201		L1-dep	7592317	0.253077
L1	87.2964	88.9599	88.8794	89.3906	88.9997	88.7052		L1	528170343	17.6057
B2	88.4826	87.8786	88.415	88.9973	88.048	88.3643		B2	59683797	1.98946
ERV1	88.601	86.5439	89.9866	88	88.2189	88.2701		ERV1	20579078	0.685969
snRNA	86.3636	87.3239	82.2785	88.2353	96.875	88.2153		snRNA	359127	0.0119709
B4	87.7294	86.7373	88.3883	88.492	87.9969	87.8688		B4	57409545	1.91365
ERVL	87.037	86.8998	87.4189	87.8917	88.865	87.6225		ERVL	31931886	1.0644
Unknown	88.172	86.1502	87.3077	88.5057	81.6993	86.367		Unknown	2876421	0.0958807
ERVL-MaLR	84.5122	86.4439	87.111	86.3985	86.6448	86.2221		ERVL-MaLR	128711405	4.29038
ID	81.8182	84.375	86.715	88.2609	86.3636	85.5065		ID	4242638	0.141421
hAT-Blackjack	84	76.3158	81.8182	95.8333	88.4615	85.2858		hAT-Blackjack	539830	0.0179943
hAT-Charlie	84.252	83.2316	87.5	87.7332	82.2412	84.9916		hAT-Charlie	18350394	0.61168
hAT-Tip100	75.6637	82.553	87.4576	89.645	83.3333	83.7305		hAT-Tip100	2483032	0.0827677
TcMar-Tc2	83.3333	81.25	81.8182	66.6667	100	82.6136		TcMar-Tc2	321719	0.010724
scRNA	86	77.9412	82.377	65.4545	97.2222	81.799		scRNA	981087	0.0327029
TcMar-Tigger	77.3756	80.9074	81.4706	82.4281	80.787	80.5937		TcMar-Tigger	5258119	0.175271
L2	79.3279	79.4828	80.0074	81.9801	81.6456	80.4887		L2	11852679	0.395089
MIR	79.6694	78.8729	80.127	79.2279	81.3609	79.8516		MIR	14616655	0.487222
CR1	76.8421	75.641	81.4346	77.7778	79.6748	78.2741		CR1	2023376	0.0674459
DNA	68.4211	70.9302	84.7826	77.7778	80	76.3823		DNA	501625	0.0167208
RTE-BovB	80	72.4638	72.2222	77.4194	66.6667	73.7544		RTE-BovB	417044	0.0139015
RTE-X	88.8889	73.5294	71.0526	55.5556	75	72.8053		RTE-X	293556	0.0097852
Gypsy	51.8519	68.75	59.4203	85.1852	86.6667	70.3748		Gypsy	566476	0.0188825
hAT-Tag1	60	40	100	100	50	70		hAT-Tag1	114762	0.0038254
hAT	100	52.381	71.4286	66.6667	50	68.0952		hAT	206036	0.00686787
hAT-Ac	50	80	69.2308	56.6667	75	66.1795		hAT-Ac	468033	0.0156011
Simple_repeat	55.0983	63.9921	68.4319	65.4406	64.6029	63.5132		Simple_repeat	67976547	2.26588
srpRNA	100	91.6667	100	8	6.66667	61.2667		srpRNA	73772	0.00245907
Low_complexity	43.0189	48.2595	55.9633	58.3665	47.3282	50.5873		Low_complexity	10060559	0.335352
tRNA	51.8519	53.9474	30.5785	35.2273	20.4955	38.4201		tRNA	340466	0.0113489

## Sheet: mouse mtdna
	Nuclear depth (X)	MtDNA depth (X)	Mt/Nuc Ratio	Loge (Mt/Nuc)	Methylation				Nuclear (Mb)	Mt (Mb)	% of Capacity
1 hip	0.00613	8.78054	1432.39	7.2671	0.215633				19.616	1.42245	6.76118
2 hip	0.02001	20.0261	1000.8	6.90856	0.256148
3 hip	0.0182	25.4044	1395.85	7.24126	0.27921				Average methylation	Percent
4 hip	0.01012	18.815	1859.19	7.5279	0.152999				Hippocampus	1.27921	2.35555
5 hip	0.00791	16.0728	2031.96	7.61676	5.49208				Cortex	0.864329	1.56972
1 cortex	0.0182	25.4044	1395.85	7.24126	0.27921				Testes	0.724898	0.902073
2 cortex	0.01345	31.4846	2340.86	7.75827	0.112108				Low control	0.200546	0.0190357
3 cortex	0.00459	6.87656	1498.16	7.31199	0.0724113				High control	97.3438	0.428372
4 cortex	0.00443	8.14792	1839.26	7.51712	0.189155
5 cortex	0.00287	4.63354	1614.47	7.38676	3.66876
1 testes	0.03175	4.99362	157.279	5.05802	0.328587
2 testes	0.00309	0.389594	126.082	4.83693
3 testes	0.01227	1.66354	135.578	4.90955	0.37037
4 testes	0.02364	7.25591	306.934	5.72663	0.131666
5 testes	0.01737	3.44868	198.542	5.291	2.06897
1 low control	0.02115	216.751	10248.3	9.23486	0.187577	Derived from liver DNA
2 low control	0.03823	361.214	9448.44	9.15361	0.191849	Derived from liver DNA
3 low control	0.02865	311.359	10867.7	9.29355	0.195253	Derived from liver DNA
4 low control	0.03679	374.244	10172.4	9.22744	0.234202	Derived from liver DNA
5 low control	0.02005	208.981	10423	9.25177	0.193848	Derived from liver DNA
1 high control	0.0162	23.4599	1448.14	7.27804	97.9089	Derived from liver DNA
2 high control	0.02143	37.1772	1734.82	7.45866	97.3005	Derived from liver DNA
3 high control	0.00991	8.45641	853.321	6.74914	97.2985	Derived from liver DNA
4 high control	0.019	21.9026	1152.77	7.04992	96.8671	Derived from liver DNA
	min	0.389594
	max	374.244
*Autosomes only. No ChrY, no Chr_random

## Sheet: chimp mtdna
	Nuclear depth (X)	MtDNA depth (X)	Mt/Nuc Ratio	Loge (Mt/Nuc)
chimp 11X blood	11.7423	63.4733	5.40553	1.68742	Blood
