# Supplementary material for: Genome skimming with nanopore sequencing precisely determines global and transposon DNA methylation in vertebrates
Source: HighWire-hosted journal article supplement (doi:10.1101/gr.277743.123), 2023-06-01
Supplement: Supplemental_Methods.pdf [file Supplemental_Methods.pdf]

| Global DNA Methylation via Genome Skimming from Nanopore Long-read Data |
|-------------------------------------------------------------------------|
| Coverage Depth Estimation                                               |
| Biological and Technical Replication at Low Coverage                    |
| Skimming Pipeline                                                       |
| Vertebrate Genomes                                                      |
| Mitochondria Analysis                                                   |
| Transposon Analysis                                                     |

## Genome Skimming

Chris Faulk

## Global DNA Methylation via Genome Skimming from Nanopore Long-read Data

Purpose: Most methods that characterize a global value for 5'methylcytosine are either expensive, error-prone, or rely upon bisulfite conversion which causes measurement challenges. The nanopore instrument can natively call 5'methylation along with other modifications. Here I present a method of determining a single percentage value of any genome's 5'mCpG vs. unmethylated CpG sites (i.e. global methylation) by sequencing genomes at very low coverage (i.e. skimming) at ranges from 0.1X to 0.0001X. Separately, I extract high copy transposon families and assessed their methylation independently.

## Coverage Depth Estimation

Genome skimming is defined as shallow sequencing down to 0.05X coverage of a genome (0.05X). For a typical 3 Gb mammal genome this equates to 150 Mb of reads. Here I show that for global DNA methylation, even 0.01X coverage of a primate genome results in an error of less than 1% difference from the true value. The sampling was bootstrapped 10 times to determine error.

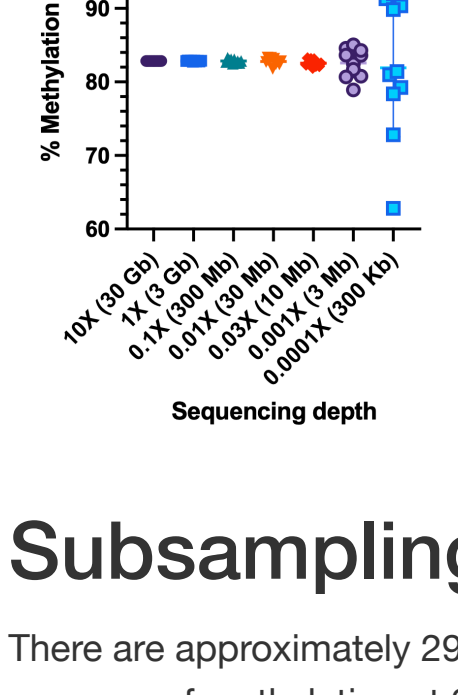

## Subsampling Methods

There are approximately 29 million CpG sites in the human genome and to get sub-percentile accuracy of their methylation, a measure of methylation at 300,000 sites will suffice. Since the genome is non-uniform with respect to CpG density and location, converting this number into base coverage is not uniform. Here I show how to quantify methylation on number of total bases sequenced since that is how a sequencer counts reads and how the user determines how much is enough DNA sequenced for skimming or assembly or other purposes. To estimate whether a certain level of coverage will contain enough CpG sites for accurate methylation, it was necessary to empirically sample the reads, quantify methylation, and repeat the subsampling by bootstrapping to be confident that a global value is correct.

Here I used the chimp genome as one of 4 primate genomes I sequenced to high depth. The full dataset averages 82.84102% methylation over 11.12X coverage (33,921,056,788 bp) in the mapped bam file. Subsamples were taken at 10X, 1X, 0.1X, 0.01X and 0.001X coverage and with 10 random subsets drawn, and methylation calculated for these 10 bootstrap replicates.

- 10X = 30504547470 bp = 10 \* (33921056788 / 11.12). Therefore 0.899 \* total bases = 10X. Sample 10X coverage 10 times.
- Determine coverage. `mosdepth -t 32 --fast-mode rhesus.barcode02_chimp.modmapped.bam`
- Downsample the bam file with replicates.

```
for i in {1..10}; do samtools view -@ 32 -b --subsample 0.899 --subsample-seed $RANDOM total-chimp.modmapped.bam > bootstrap10X/total-chimp.modmapped.bam.10X.$i.bam ; samtools index -@ 32 bootstrap10X/total-chimp.modmapped.bam.10X.$i.bam ; done
```

- Convert bams to bed.

```
for i in bootstrap10X/**.bam; do modkit pileup -t 32 --cpg --ref panTro6.fa --combine-strands $i $i.modkit.bed ; done
```

- Use awk to average methylation.

```
for i in *.bed ; do awk ' $4=="m" {can+=$13; mod+=$12; oth+=$14; valid+=$10} END{(can/valid) * CpG canonical\n' (mod/valid) * 5mCpG modified\n' (oth/valid) * 5hmCpG modified')' $i >> bootstrap10X.txt; done
```

- 1X = 30504547470 bp = 1 \* (33921056788 / 11.12). Therefore 0.090 \* total bases = 1X. Sample 1X coverage 10 times.

```
for i in {1..10}; do samtools view -@ 32 -b --subsample 0.089 --subsample-seed $RANDOM total-chimp.modmapped.bam > bootstrap1X/total-chimp.modmapped.bam.1X.$i.bam ; samtools index -@ 32 bootstrap1X/total-chimp.modmapped.bam.1X.$i.bam ; done
```

- Repeat steps as in 10X for 1X ..0.0001X

## Biological and Technical Replication at Low Coverage

I used 5 biological replicates of 3 tissues from mouse to determine intersample precision, i.e., reproducibility. I also included replicates of high and low methylated control DNA.

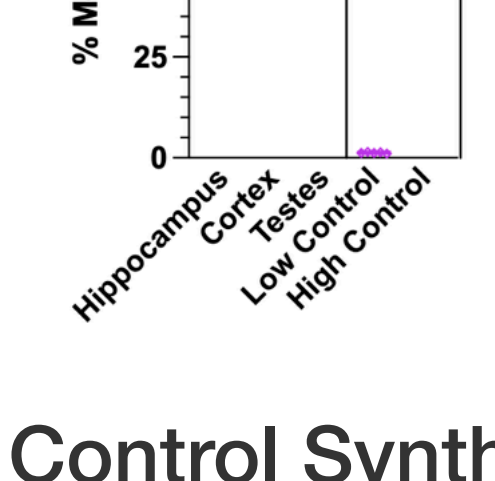

## Control Synthesis Methods

### Low Methylation control DNA

This input was derived from mouse genomic DNA extracted from liver tissue using a Zymo Quick DNA miniprep plus kit (cat. D4068). A small amount of DNA was used as input to a Qiagen Repli-q whole genome amplification kit (cat. 150023) according to instructions. The resulting DNA amplified DNA is unmethylated, however the sample still contains a small amount of the original mouse derived natively methylated DNA, hence the name "low methylation control" rather than "0%". The DNA was then library prepped with ONT's LSK-114 kit and sequenced on an R10.4.1 flow cell at 400 bps. Bases were called by Guppy v6.3.9 with the `dna_r10.4.1_e8.2_400bps_modbases_5mc_cg_sup.cfg` model.

### High Methylation Control DNA

This sample was derived from mouse genomic DNA extracted from liver tissue using a Zymo Quick DNA miniprep plus kit (D4068). The DNA was subjected to CpG methylase treatment to induce high levels of 5'mCpG using a Zymo CpG methylase kit (E2010) according to instructions. Due to enzymatic limitations, the kit will not achieve perfect 100% methylation, hence the name "high methylation control". The DNA was then library prepped with ONT's LSK-114 kit and sequenced on an R10.4.1 flow cell at 400 bps. Bases were called by Guppy v6.3.9 with the `dna_r10.4.1_e8.2_400bps_modbases_5mc_cg_sup.cfg` model.

## Skimming Pipeline

Pipeline for analysis is as follows:

- Optional. If you did not choose to call live during the run with SUP accuracy and DNA methylation detection turned on, or if you want to use a different model, you can re-basecall with guppy post-hoc using the original fast5 files. Guppy v6.3.8 was used here. NVIDIA GPU with CUDA cores is highly recommended to speed up base calling.

```
# Actual run command
/opt/ont/guppy/bin/guppy_basecaller -i /mnt/synology/ont-sequencing-run-storage/Skimming-methylation/mouse-skin-hp-cortex-testes-reps/no_sample/20230116_1229_NN34646_FAV16314_694e180d/fast5_pass/ --s -o dna_r10.4.1_e8.2_400bps_modbases_5mc_cg_sup.cfg --bam_out -x cuda:all --recursive --trim_adapters --barcode_kits SRR-RBK114-24 --do_read_splitting

# Generic run command
opt/ont/guppy/bin/guppy_basecaller -i /path/to/fast5_pass/ --s /output/path -c dna_r10.4.1_e8.2_400bps_modbases_5mc_cg_sup.cfg --bam_out -x cuda:0
```

- Concatenate all the unmapped bam files containing modified base information.

```
samtools cat -o total.bam *input.bam
```

- Map unmapped Bams to a reference. Map, convert and sort all in one command. The `-T XM,HL` flag carries over the modifications from bam to fastq. In newer bams the flags are `-T XM,HL`. The `-y` flag copies input fastq commands to output.

```
# Convert unmapped bam to fastq, pipe output to minimap2, pipe output to samtools for sorting and indexing without writing intermediate files to disk. (Need sufficient RAM)

samtools fastq -T XM,HL total.bam | minimap2 -y -ax map-ont <genome>.fa - -t 32 | samtools view -u | samtools sort -@ 32 -o total.modmapped.bam; samtools index total.modmapped.bam -@ 32
```

- Convert to bed format. The `-d` flag limits depth to save memory. The aggregate flag adds together bases on either strand and creates and aggregate.bed file. The `-cpg` flag limits to cpg sites.

```
# Convert mapped bam file reads to .bed format to quantiate methylation by position.
modkit pileup -t 32 --cpg --ref <genome>.fa --combine-strands file.bam file.modkit.bed
```

- Determine methylation percentage by counting all canonical (5CpG) and modified (5mCpG) sites and dividing. Use the `--combine-strands` flag as it aggregates cytosine calls from both palindromic sides of the opposite strands.

```
# For every CpG dinucleotide, add up the count of canonical unmethylated cytosines (column 13) and the 5' methylated cytosines (column 12) at every mapped position. Divide the number of modified cytosines by the total number of cytosines.

# Note that modkit produces a stranded and a combined "modkit" file. The combined file adds together the opposite strand cytosine counts together since they represent the same palindromic cytosine. This increases power.
```

```
awk ' $4=="m" {can+=$13; mod+=$12; oth+=$14; valid+=$10} END{print (can/valid) " CpG canonical\n" (mod/valid) " 5mCpG modified\n" (oth/valid) " 5hmCpG modified")' file.modmapped.modkit.bed
```

## Vertebrate Genomes

DNA from species representing the full vertebrate radiation were collected through commercial suppliers and gifts from collaborators. All samples were derived from muscle tissue and extracted using Zymo Quick DNA Plus miniprep kits. Genomes were downloaded from Genbank with the latest reference available for each species.

- Merge and copy the bams for each barcode.

```
samtools cat -o total.bam *input.bam
```

- Map to genome.

```
samtools fastq -T XM,HL total.bam | minimap2 -y -ax map-ont <reference>.fa - -t 32 | samtools view -u | samtools sort -@ 32 -o animal.modmapped.bam; samtools index animal.modmapped.bam -@ 32
```

- Use `--split-prefix temp` if the genome is too large for minimap2.
- Convert to bed file.

```
modkit pileup -t 32 --cpg --ref genome.fa --combine-strands file.bam file.modkit.bed
```

- Calculate Methylation.
- Basic stats `bam stats --in animal.modmapped.bam --basic`
- Average quality `samtools stat animal.modmapped.bam | grep "average quality"`
- Copy to Excel and Graphpad for graphics.

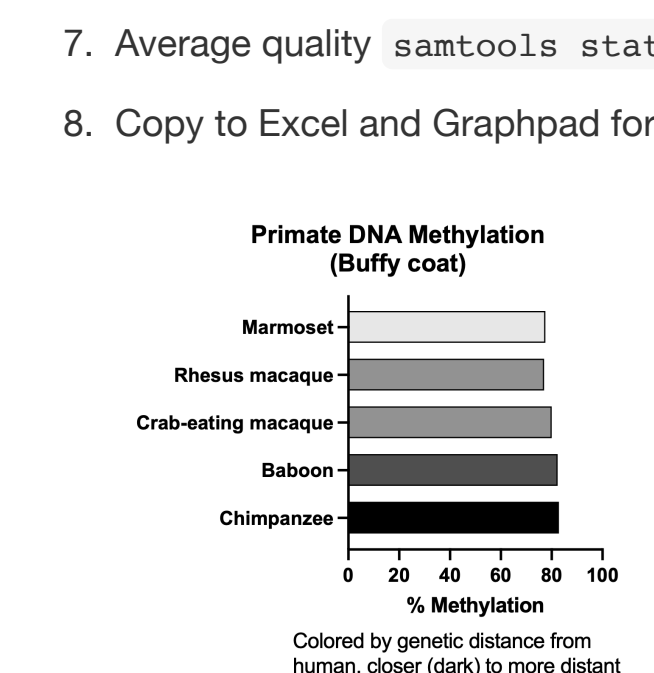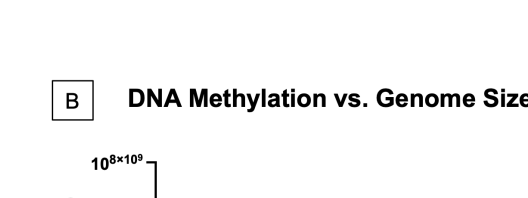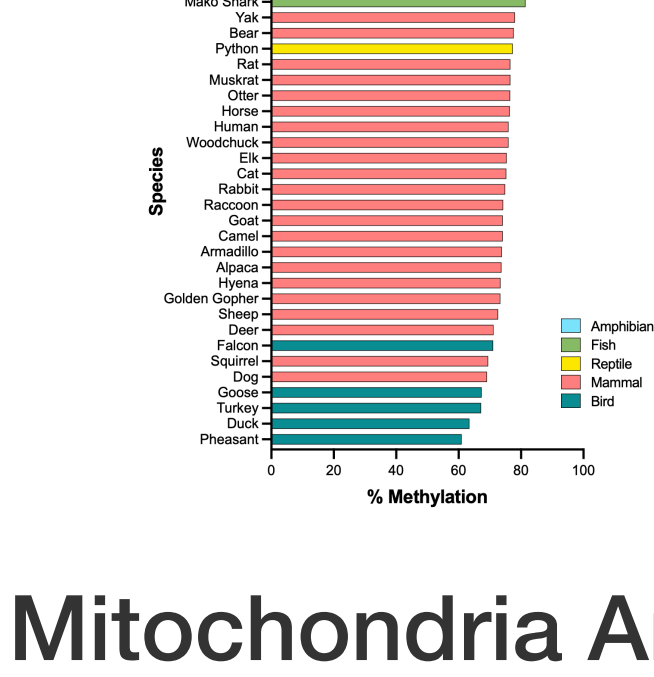

## Mitochondria Analysis

Determine the mitochondrial to nuclear DNA ratio

Calculate average depth for all autosomes and compare mitochondrial depth to other chromosomes. Here I ran samtools coverage on all mouse replicates to determine coverage differences between mitochondrial and nuclear chromosomes by tissue. I also compared it to the coverage of chimp blood. The mtnuclear ratio is typically reported as the natural log.

```
# Get the coverage depth of each mouse sample
samtools coverage 1.mouse.hippocampus.modmapped.bam > 1.mouse.hippocampus.modmapped.bam.cov.tsv
```

```
# Measure methylation using modkit beds filtered for chrM
cat *.mouse.hippocampus.modmapped.modkit.bed | grep chrM | awk ' $4=="m" {can+=$13; mod+=$12; oth+=$14; valid+=$10} END{print (can/valid) " CpG canonical\n" (mod/valid) " 5mCpG modified\n" (oth/valid) " 5hmCpG modified")' -
```

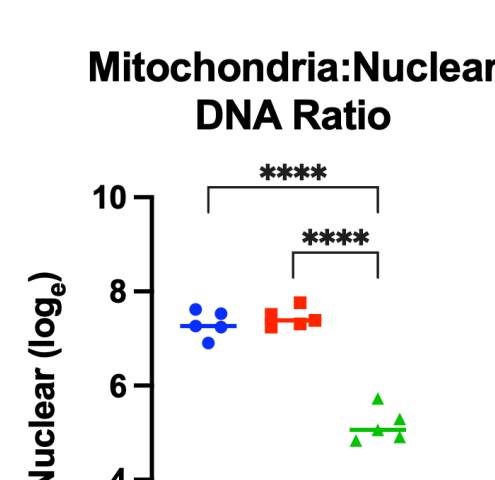

## Transposon Analysis

### Primate LINE1 and Alu elements

These 2 elements alone account for ~30% of the genome sequence and are the most abundant transposable elements in humans (Lander et al).

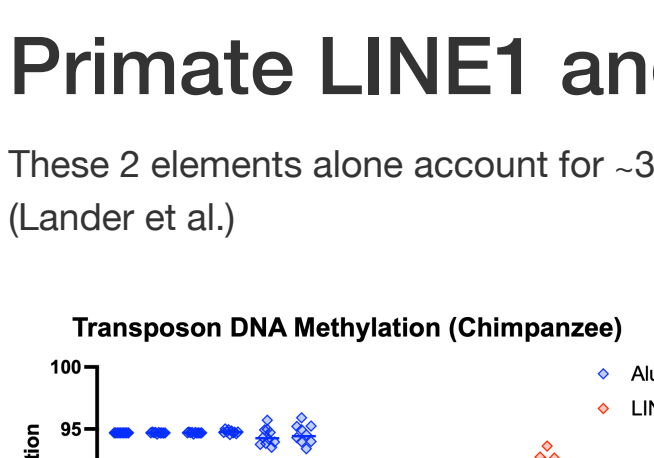

### All Repeats Genome-wide

- Mouse transposons that make up >1% of the genome were grouped by tissue for comparison.

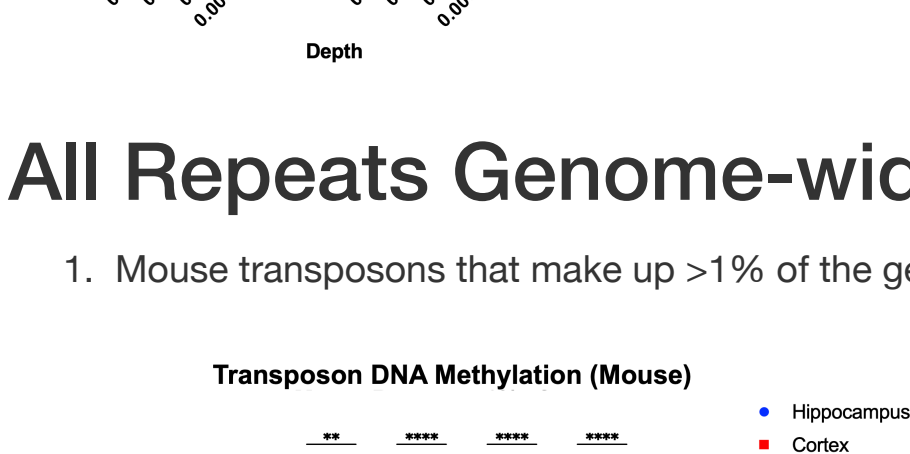

- Repeat families are show for mouse (with replicate values from hippocampus), and chimp (no replicates). Highlighted in red are repeats making up >1% of the genome.

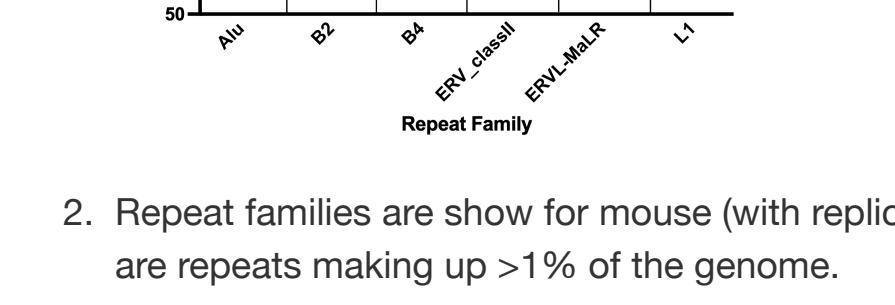

## Transposon Pipeline

### Chimpanzee LINE1 and Alus Specifically

- Table Browser -> Repeats -> Table "rmsk" -> All fields from selected table -> repeat-table.tsv
- Get all L1's from Repeats tsv and print into All format.

```
awk ' $13=="L1" {print $6 "\t" $7 "\t" $8 "\t" $13}' panTro6-repeat-table.tsv > repeatL1.bed
```

- Intersect all CpG sites that fall within L1 coordinates and generate their methylation

```
for i in *.bed ; do bedtools intersect -a $i -b ./repeatL1.bed > $i.cpgintersect.bed ; done
for i in *.cpgintersect.bed ; do awk ' $4=="m" {can+=$13; mod+=$12; oth+=$14; valid+=$10} END{print mod/valid} $1 >> L1.bootstrap10X.txt ; done
```

- 90.1616% L1 methylation in the 11.12X coverage chimp genome.
- 94.6853% Alu in the chimp genome.
- Downsample the reads to 0.001X (3 Mb) and plot 10 bootstrap replicates.
- Use the pre-made downsampld modkit bed files in the bootstrap directories
- Make intersection files for each bootstrap.

```
for i in bootstrap10X/**.modkit.bed ; do bedtools intersect -a $i -b repeatL1.bed > $i.cpgintersect.L1.bed ; done
```

- Use awk to print the methylation to a file.
- Repeat for each read level.
- Repeat for Alus.

### Chimpazee All Repeats

- Chimp. Make an intersection of all repeats and cpg sites with `-wa` and `-wb` to combine beds.

```
bedtools intersect -a total-chimp.modmapped.modkit.bed -b repeatAll1.bed -wa -wb > repeatAll.cpgintersect.bed
```

- Mouse. Repeat as with Chimp, but use all 5 mouse hippocampus samples that share common rows for methylation data.

### Mouse Repeats

#### Mouse All Repeats

- Download all mm39 repeats from USCS Table Browser.
- Convert to bed format.

```
awk '{print $6 "\t" $7 "\t" $8 "\t" $13}' mm39-repeat-table.tsv > mm39-repeat-table.bed
# Remove the header line manually.
```

- Make an intersection of all repeats and cpg sites with `-wa` and `-wb` to combine beds. Loop for all files.

```
# Make modkit files with tabs in the "mouse_repeats" directory
for i in *.modmapped.bam; do modkit pileup -t 32 --cpg --only-tabs --ref ~/Desktop/genomes/mouse/mm39.fa --combine-strands $i mouse-repeats/$i.modkit.bed ; done
```

```
# Intersect these files with the repeat table
for i in *.modkit.bed ; do bedtools intersect -a $i -b mm39-repeat-table.bed -wa -wb > $i.cpgintersect.bed ; done
```

- Use R program `repeats-rmd.rmd` (copied below) to summarize methylation on a per-repeat basis and copy results into Graphpad for analysis and visualization.

```
##
# Import necessary libraries
library(tidyverse)

# First convert the bed file spaces to tabs
# Read in bed file
data <- read_tsv("repeatAll.cpgintersect.bed", col_names=FALSE)

# Calculate sum of column 13 divided by all valid sites
data$result <- data$X12 / (data$X10)
data <- data %>% drop_na()
data$result

# Separate out by factors in column 24
data.by_factor <- data %>% group_by(X24) %>% summarize(result = mean(result))
data.by_factor
write.table(data.by_factor, file = "repeatAll.cpgintersect.bed.databyfactor.tsv")

# Make a bar plot of the result
ggplot(data.by_factor, aes(x = X24, y = result)) + geom_bar(stat = "identity") +
  theme(axis.text.x = element_text(angle = 90, vjust = 0.5))
##
```
